# Supplementary material for: TRPV4 regulates calcium homeostasis, cytoskeletal remodeling, conventional outflow and intraocular pressure in the mammalian eye
Source: PubMed Central journal article supplement (PMC4980693; doi:10.1038/srep30583), 2016-08-11
Supplement: srep30583-s1.pdf [file srep30583-s1.pdf]

## Supplementary Information

Daniel A. Ryskamp, Amber M Frye, Tam T.T. Phuong, Oleg Yarishkin, Andrew O. Jo, Yong Xu, Monika Lakk, Anthony Iuso, Sarah N. Redmon, Balamurali Ambati, Gregory Hageman, Glenn D. Prestwich, Karen Y. Torrejon & David Križaj: **TRPV4 regulates calcium homeostasis, cytoskeletal remodeling, conventional outflow and intraocular pressure in the mammalian eye**

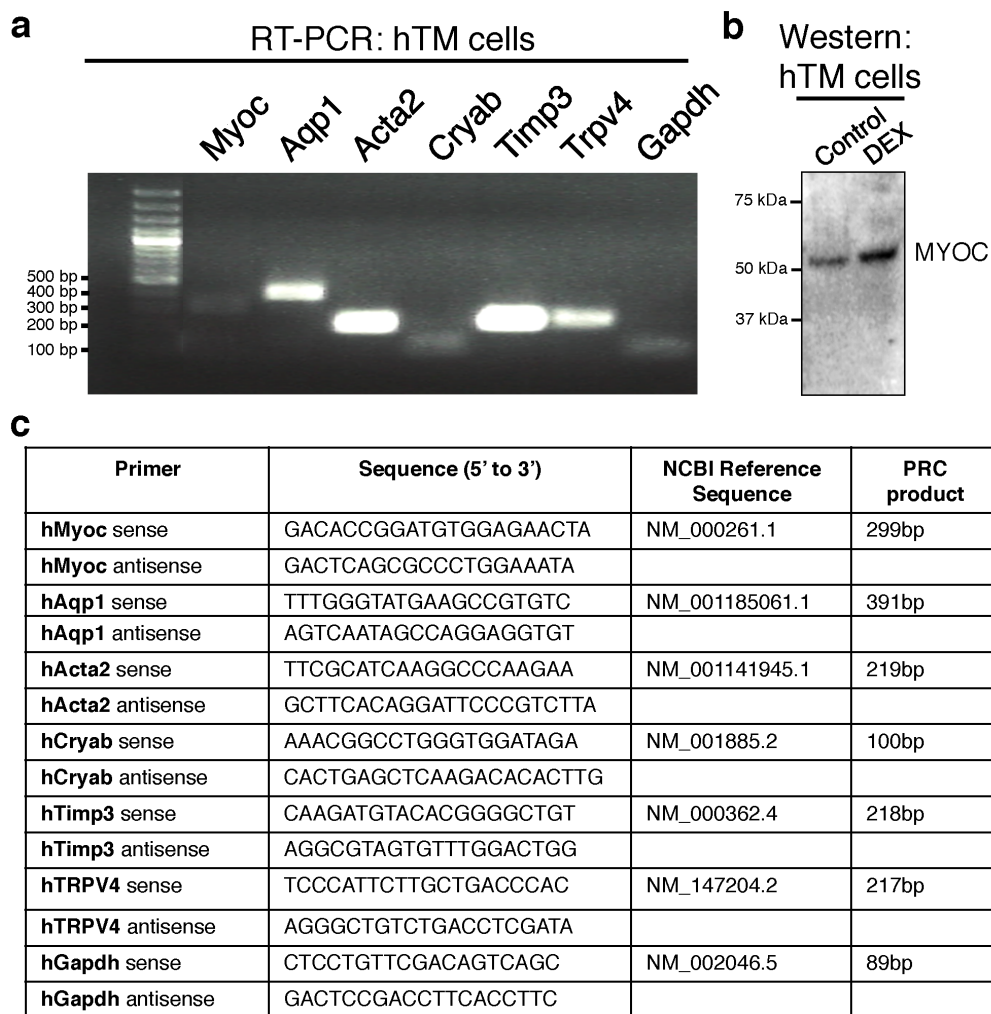

**Supplementary Figure 1.** Validation of cultured TM cells. (A) Expression of transcripts for TM-specific marker genes in cultured hTM cells. Expression of mRNAs coding for *Myoc*, *Aqp1*, *Acta2*, *Timp3*, *Trpv4* and *Gapdh* was at the expected amplicon sizes. (B) Western blot

with an anti-myocilin antibody. Exposure of cell cultures to 100 nM DEX for 2 days upregulated myocilin expression in hTM cells. (C) PCR primer information.

**Supplementary Video 1.** Simultaneous imaging of GSK101-induced mApple:actin remodeling and  $[Ca^{2+}]_i$  dynamics in a representative time-lapse of a Fura-2 loaded hTM cells.
